# Supplementary material
Source: PubMed Central journal article supplement (PMC5973529)
Supplement: NIHMS942608-supplement-supplement_1.pdf [file NIHMS942608-supplement-supplement_1.pdf]

**TABLE S1: The ADOPT Working Group Members****Leadership Team**

Paul S. MacLean, PhD, University of Colorado School of Medicine (Co-Chair)  
 Alexander J. Rothman, PhD, University of Minnesota (Co-Chair)  
 Catherine M. Loria, PhD, MS, MA, National Heart, Lung, and Blood Institute  
 Holly L. Nicastro, PhD, MPH, National Heart, Lung, and Blood Institute  
 Susan M. Czajkowski, PhD; National Cancer Institute  
 Tanya Agurs-Collins, PhD, RD; National Cancer Institute  
 Elise L. Rice, PhD; National Cancer Institute  
 Katrina J. Serrano, PhD, CHES; NIH Office of Research on Women's Health

**Working Group:**

S. Sonia Arteaga, PhD<sup>1</sup>; National Heart, Lung, and Blood Institute  
 Rachel Ballard, MD, MPH<sup>1</sup>; Office of Disease Prevention  
 David Berrigan, PhD, MPH<sup>1</sup>; National Cancer Institute  
 Daniel H. Bessesen, MD<sup>2</sup>; University of Colorado, Anschutz Medical Campus  
 Kerri Boutelle, PhD<sup>3</sup>; University of California San Diego  
 Molly Bray, PhD<sup>4</sup>, The University of Texas at Austin  
 Anita P. Courcoulas, MD, MPH, FACS<sup>2</sup>; University of Pittsburgh Medical Center  
 Elissa Epel, PhD<sup>3</sup>; University of California San Francisco  
 Mary Evans, PhD<sup>5</sup>; National Institute of Diabetes and Digestive and Kidney Diseases  
 Paige A. Green, PhD, MPH<sup>3</sup>; National Cancer Institute  
 Amy Gorin, PhD<sup>1</sup>; University of Connecticut  
 Kevin D. Hall, PhD<sup>2</sup>; National Institute of Diabetes and Digestive and Kidney Diseases  
 Mark Hopkins, PhD<sup>4</sup>; University of Leeds  
 Christine M. Hunter, PhD, ABPP<sup>3</sup>; Office of Behavioral and Social Sciences Research, NIH  
 John M. Jakicic, PhD<sup>5</sup>; University of Pittsburgh  
 Aaron D. Laposky, PhD<sup>5</sup>; National Heart, Lung, and Blood Institute  
 Maren R. Laughlin, PhD<sup>4</sup>; National Institute of Diabetes and Digestive and Kidney Diseases  
 Leslie A. Lytle, PhD<sup>5</sup>; University of North Carolina, Chapel Hill  
 Padma Maruvada, PhD<sup>4</sup>; National Institute of Diabetes and Digestive and Kidney Diseases  
 Richard P Moser, PhD; National Cancer Institute  
 Lis Nielsen, PhD<sup>3</sup>; National Institute on Aging  
 Tiffany M. Powell-Wiley, MD, MPH, FAHA<sup>1</sup>; National Heart, Lung, and Blood Institute  
 Charlotte Pratt, PhD, MS, RD, FAHA<sup>1</sup>; National Heart, Lung, and Blood Institute  
 Naresh M. Punjabi, MD, PhD<sup>5</sup>; Johns Hopkins University School of Medicine  
 Jill Reedy, PhD, MPH, RD<sup>1</sup>; National Cancer Institute  
 Susan B. Roberts, PhD<sup>4,5</sup>; Tufts University  
 Michael Rosenbaum, MD<sup>4</sup>; Columbia University Medical Center  
 Donna H. Ryan, MD<sup>2</sup>; Pennington Biomedical Research Center  
 Brian E. Saelens, PhD<sup>1</sup>; University of Washington  
 Cary R. Savage, PhD<sup>4</sup>; University of Nebraska, Lincoln  
 Dana M Small, PhD<sup>4</sup>, Yale Medical School  
 Luke E. Stoeckel, PhD<sup>4</sup>; National Institute of Diabetes and Digestive and Kidney Diseases  
 Angelina R. Sutin, PhD<sup>3</sup>; Florida State University College of Medicine  
 Aynur Unalp-Arida, MD, MSc, PhD<sup>4</sup>; National Institute of Diabetes and Digestive and Kidney Diseases  
 David M. Williams, PhD<sup>3</sup>; Brown University School of Public Health

Susan Z. Yanovski, MD; National Institute of Diabetes and Digestive and Kidney Diseases  
Deborah Young-Hyman, PhD<sup>3</sup>; Office of Behavioral and Social Sciences Research, NIH  
Shannon N. Zenk, PhD, MPH, RN<sup>1</sup>; University of Illinois at Chicago

<sup>1</sup>Environmental Domain

<sup>2</sup>Perspectives Group

<sup>3</sup>Psychosocial Domain

<sup>4</sup>Biological Domain

<sup>5</sup>Behavioral Domain

## TABLE S2: Use of the GEM Workspaces in the ADOPT Project

The ADOPT Working Group utilized the Grid-Enabled Measures (GEM) Database to organize their work. The GEM database contains multidisciplinary measures organized by theoretical constructs (<https://www.gem-measures.org/>). GEM enables researchers to collaborate with others, encourages the use of common measures, and facilitates the sharing of harmonized data.

GEM allows users to request that a workspace be created to facilitate collaboration on a specific topic. The constructs and measures associated with the workspace can be accessed through the workspace or through the lists of all constructs and measures entered in GEM.

### How to Get Involved in ADOPT

1. You can view the list of core measures from all four ADOPT domains in the [Accumulating Data to Optimally Predict obesity Treatment \(ADOPT\) Core Measures \(November, 2017\) Workspace](https://www.gem-measures.org/Public/wsoverview.aspx?wid=35&cat=8) (<https://www.gem-measures.org/Public/wsoverview.aspx?wid=35&cat=8>)
  - Within this workspace, GEM users can update or add supporting information for these constructs and measures, comment on them, and rate them (on it quality, ease of administration, ease of completion, and availability).
  - Note, that you cannot add new constructs or measures through this workspace.
2. If you wish to enter additional constructs and measures into GEM for consideration in future revisions to ADOPT, use one of these four “in progress” workspaces:
  - [Behavioral Workspace](https://www.gem-measures.org/Public/wsoverview.aspx?cat=8&wid=24)  
(<https://www.gem-measures.org/Public/wsoverview.aspx?cat=8&wid=24>)
  - [Biological Workspace](https://www.gem-measures.org/Public/wsoverview.aspx?cat=8&wid=25)  
(<https://www.gem-measures.org/Public/wsoverview.aspx?cat=8&wid=25>)
  - [Environmental Workspace](https://www.gem-measures.org/Public/wsoverview.aspx?cat=8&wid=26)  
(<https://www.gem-measures.org/Public/wsoverview.aspx?cat=8&wid=26>)
  - [Psychosocial Workspace](https://www.gem-measures.org/Public/wsoverview.aspx?cat=8&wid=27)  
(<https://www.gem-measures.org/Public/wsoverview.aspx?cat=8&wid=27>)

Note that information cannot be added unless you are logged in as a GEM user. If you have not previously used GEM, you can register by clicking the link in the upper right-hand corner of the GEM home page (<https://www.gem-measures.org/>).
